# Supplementary material for: Clinical Flipped Classroom Model Structured with Vertical Integration
Source: Research Square preprint supplement (doi:10.21203/rs.3.rs-7808067/v1), 2026-01-28

**Table-1:** Comparison of FC education model and traditional classroom education.

| **Flipped classroom education** | **Traditional classroom education** |
| --- | --- |
| Control is in the active student | Control in educator |
| Preliminary study, subject study and homework at home | Explaining the subject in class by the educator in the classroom |
| The educator controls interaction and discussion | The educator controls the class |
| The educator guide and facilitator position | The educator in supervisory position |
| Student participation and motivation in the classroom is high | Student participation in the classroom is low, motivation depends on the educator |
| Classrooms are places where wrong learning is corrected and incomplete learning is remedied | Classrooms are places where the educator imparts knowledge |
| The center of education is the active learning student | The center of education is the educator |

**Table-2:** What is FC education method.

| **What is it?** | **What is not?** |
| --- | --- |
| Customisable, individualisable, suitable for personal learning | Not standardised |
| Dynamic | Non-static |
| Active | Not passive |
| The use of time is under the student's control | Distance learning is not |
| It is a learner-centred model | Not educator-centred |

**Table-3:** Steps of vertically structured clinical FC implementation.

| **Step 1** | **Step 2** | **Step 3** |
| --- | --- | --- |
| Watching the basic medical sciences lecture video on the subject Case-based discussion on Ensuring that the videos are | Case-based discussion on the subject in the classroom lecture, plus a question-answer section | Ensuring that the videos are watched until the end of the internship, questions that cannot be understood offline are written into the system and answered by the trainer through the system |
| Watching the clinical course video related to the subject |

**Table-4:** Classes, internships, course titles, preclinical topics covered on the basis of vertical integration in which the FC model is applied.

| **TERM** | **INTERNSHIP NAME** | **COURSE NAME** | **ANATOMY COURSE SUBJECT ON THE BASIS OF VERTICAL INTEGRATION** | **PHYSIOLOGY COURSE SUBJECT ON THE BASIS OF VERTICAL INTEGRATION** | **PHARMACOLOGY COURSE SUBJECT ON THE BASIS OF VERTICAL INTEGRATION** |
| --- | --- | --- | --- | --- | --- |
| 4 | Cardiology | Coronary Artery Diseases | Coronary Artery Anatomy |  |  |
| 4 | Pediatric Neurology | Cerebrovascular Diseases | Anatomy of Brain Arteries and Veins |  |  |
| 4 | Pediatric Neurology | Childhood Headaches | Anatomy of Brain Arteries and Veins |  |  |
| 4 | Pediatric Neurology | Approach to Hypotonic Infant and Neurovascular Diseases | Anatomy of Brain Arteries and Veins |  |  |
| 5 | Chest Diseases | Hemoptysis | Lung Anatomy and Arterial Anatomy of the Lung | Respiratory Physiology |  |
| 5 | Chest Diseases | Chronic Obstructive Pulmonary Diseases | Trachea and Bronchi Anatomy | Respiratory Physiology, Respiratory mechanism | Respiratory inhalers in Chronic Obstructive Pulmonary Diseases |
| 5 | Physical Therapy and Rehabilitation | Approach to Knee Diseases | Knee Joint Anatomy |  |  |

**Table-5:** Questionnaire questions asked to the students.

| Term |  |
| --- | --- |
| Clinical training |  |
| Course name |  |
| Sex |  |
| Answer the questions below in a way that suits you. | 1. Strongly Agree 2. I agree 3. Undecid    4. I disagree 5. Absolutely Disagree |
| | **Questionnaire questions** | | --- | | 1- Flipped classroom (FC) attracted my attention more than traditional (classical) education | | 2- I always came to class at FC by watching the lecture videos | | 3- Watching the FC videos beforehand made it easier for me to understand the topics and work with the educator | | 4- FC motivated my learning more | | 5- FC method saved me time in class to understand the topic | | 6- Preclinical reminder videos in TYE modules helped me recall previous knowledge | | 7- FC gave me important opportunities to communicate with my friends | | 8- FC allowed me to work in groups | | 9- The FC method saved me time to understand the subject | | 10- Coming to class in FC by watching the videos facilitated my participation in interactive discussion | | 11- The FC method gave me time to ask questions when I did not understand | | 12- Watching videos with resources in advance on FC made it easier for me to learn | | 13- Watching the videos on FC whenever I want increased the permanence of my learning | | 14- I welcome opportunities to use new technologies in my learning | | 15- I think that the FC method is more useful than the traditional education method | | 16- I would like to see the FC method in more lessons | | |

**Table-6:** Percentages of responses to the questionnaire on a Likert scale.


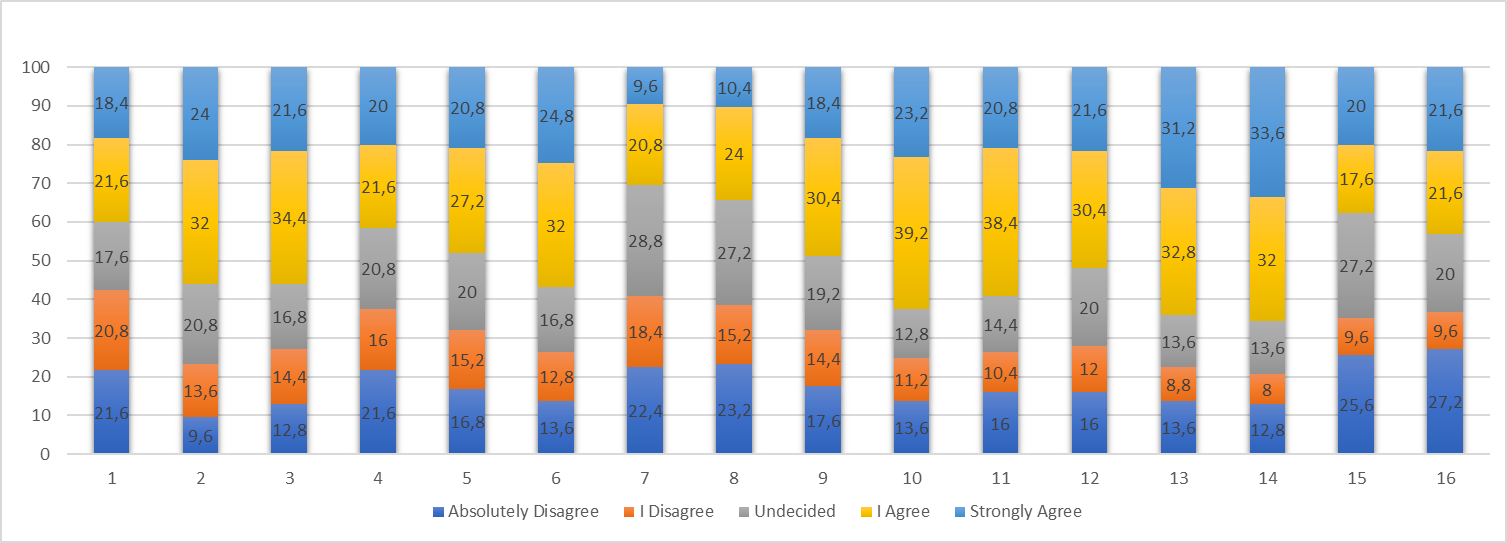

Supplement: Supplementary file 1 [file f42452c7afcd2aec9f50591c.docx]
